# Supplementary material
Source: PubMed Central journal article supplement (PMC6417433)
Supplement: NIHMS1512778-supplement-2.pdf [file NIHMS1512778-supplement-2.pdf]

| <b>Antigen</b>                  | <b>Type</b>       | <b>Clone</b> | <b>Blocking serum /buffer</b> | <b>Primary antibody dilution</b>    | <b>Source</b>                                       |
|---------------------------------|-------------------|--------------|-------------------------------|-------------------------------------|-----------------------------------------------------|
| <b>IBA1</b>                     | Rabbit polyclonal |              | Goat I-Block                  | 1:500 IF<br>1:1000 IHC<br>1:1000 WB | Dako<br>ThermoFisher                                |
| <b>IBA1</b>                     | Goat polyclonal   |              | Donkey                        | 1:500                               | Abcam                                               |
| <b>Trem2</b>                    | Sheep polyclonal  |              | Donkey                        | 1:50                                | R&D Systems                                         |
| <b>GFAP</b>                     | Goat polyclonal   |              | Donkey                        | 1:1000                              | ThermoFisher                                        |
| <b>GFAP</b>                     | Rabbit polyclonal |              | I-Block                       | 1:3000                              | Dako                                                |
| <b>Tuj1</b>                     | Mouse monoclonal  |              | I-Block                       | 1:1000                              | Biolegend                                           |
| <b>CNPase</b>                   | Mouse monoclonal  |              | I-Block                       | 1:1000                              | Abcam                                               |
| <b>A<math>\beta</math>1-16</b>  | Mouse monoclonal  | 6E10         | Donkey I-Block                | 1:300 IF<br>1:2000 WB               | Biolegend                                           |
| <b>A<math>\beta</math>17-24</b> | Mouse monoclonal  | 4G8          | Goat                          | 1:1000 IF<br>1:4000 IHC             | Biolegend                                           |
| <b>A<math>\beta</math>1-40</b>  | Rabbit monoclonal | 3552         | Donkey                        | 1:2000                              | In-house antibody <sup>6</sup>                      |
| <b>CD68</b>                     | Rat monoclonal    | FA-11        | Goat                          | 1:100                               | BioRad                                              |
| <b>Murine ApoE</b>              | Mouse monoclonal  | HJ6.3/b      | Donkey I-Block                | 1:300 IF<br>1:700 WB                | D. Holtzman lab, Washington University <sup>7</sup> |
| <b>Human ApoE</b>               | Mouse monoclonal  | HJ15.7       | Horse I-Block                 | 1:3000 IHC<br>1:700 WB              | D. Holtzman lab, Washington University <sup>8</sup> |

**Supplementary Table 1.** List of antibodies used for experiments in mice and humans. IF – immunofluorescence staining; IHC – immunohistochemistry; WB- Western blot.

| Case # | Brain bank | Clinical diagnosis                         | Age at death | Sex | Post mortem delay (days) | Braak & Braak AD stage | TREM2 variant | ApoE status | Thal phase A $\beta$ | Modified CERAD | NIA classification |
|--------|------------|--------------------------------------------|--------------|-----|--------------------------|------------------------|---------------|-------------|----------------------|----------------|--------------------|
| #1     | Munich     | Dementia, not specified                    | 86           | M   | 16-40                    | 5                      | p.R62H        | E3/E3       | 4                    | C              | A3 B3 C3           |
| #2     | Munich     | Dementia, not specified                    | 81           | F   | n.i.                     | 5                      | p.R62H        | E3/E3       | 5                    | C              | A3 B3 C3           |
| #3     | Munich     | Dementia with rapid progression            | 75           | M   | 24                       | 6                      | p.R62H        | E3/E4       | 5                    | C              | A3 B3 C3           |
| #4     | Munich     | Dementia Alzheimer type                    | 78           | F   | 21                       | 6                      | p.R62H        | E4/E4       | 5                    | C              | A3 B3 C3           |
| #5     | Munich     | Dementia frontotemporal                    | 77           | M   | 26                       | 5                      | p.R62C        | E3/E3       | 4                    | C              | A3 B3 C3           |
| #6     | Munich     | Dementia frontotemporal                    | 78           | M   | 5                        | 5                      | p.D87N        | E3/E4       | 5                    | C              | A3 B3 C3           |
| #7     | UCL        | Pick's Disease                             | 71           | M   | 40                       | 6                      | p.D87N        | E3/E4       | 5                    | C              | A3 B3 C3           |
| #8     | UCL        | Probable cortico-basal degeneration        | 64           | M   | 36                       | 6                      | p.R47H        | E3/E4       | 5                    | C              | A3 B3 C3           |
| #9     | UCL        | AD                                         | 66           | F   | 51                       | 6                      | p.R47H        | E4/E4       | 5                    | C              | A3 B3 C3           |
| #10    | Munich     | Dementia, Alzheimer type familial          | 62           | F   | 132                      | 6                      | None          | E3/E4       | 5                    | C              | A3 B3 C3           |
| #11    | Munich     | Moderate dementia, probable Alzheimer type | 82           | M   | 15                       | 6                      | None          | E3/E4       | 5                    | C              | A3 B3 C3           |
| #12    | Munich     | Dementia Alzheimer type                    | 93           | F   | n.i.                     | 5                      | None          | E4/E4       | 5                    | C              | A3 B3 C3           |
| #13    | UCL        | Young onset AD                             | 64           | F   | 76                       | 6                      | None          | E3/E3       | 5                    | C              | A3 B3 C3           |
| #14    | UCL        | AD (Logopenic Asphasia)                    | 62           | M   | 34                       | 6                      | None          | E3/E4       | 5                    | C              | A3 B3 C3           |

**Supplementary Table 2.** Demographic and clinical characteristics of the control and TREM2 coding variant groups; n.i. – no information
